# Supplementary material for: Water-Soluble Humic Materials Modulating Metabolism and Triggering Stress Defense in Sinorhizobium fredii
Source: PubMed Central journal article supplement (PMC8552645; doi:10.1128/spectrum.00293-21), 2021-08-25
Supplement: spectrum00293-21_supp_1_seq9.pdf [file spectrum00293-21_supp_1_seq9.pdf]

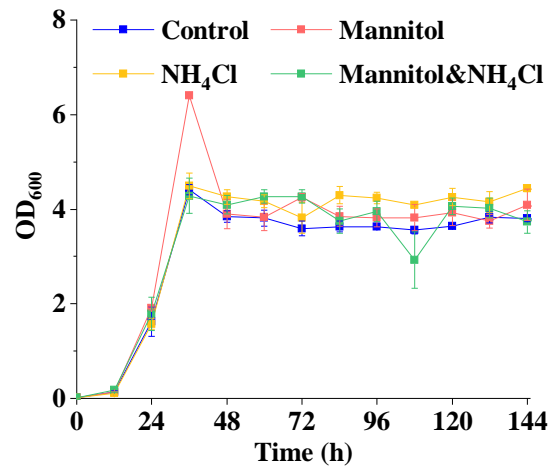

**Fig. S1.** Effects of external addition of mannitol or NH<sub>4</sub>Cl with an equivalent amount of carbon or nitrogen in 0.5 g/L WSHM on the growth of *S. fredii* CCBAU45436. The data are presented as the means  $\pm$  standard deviations from triplicate experiments.

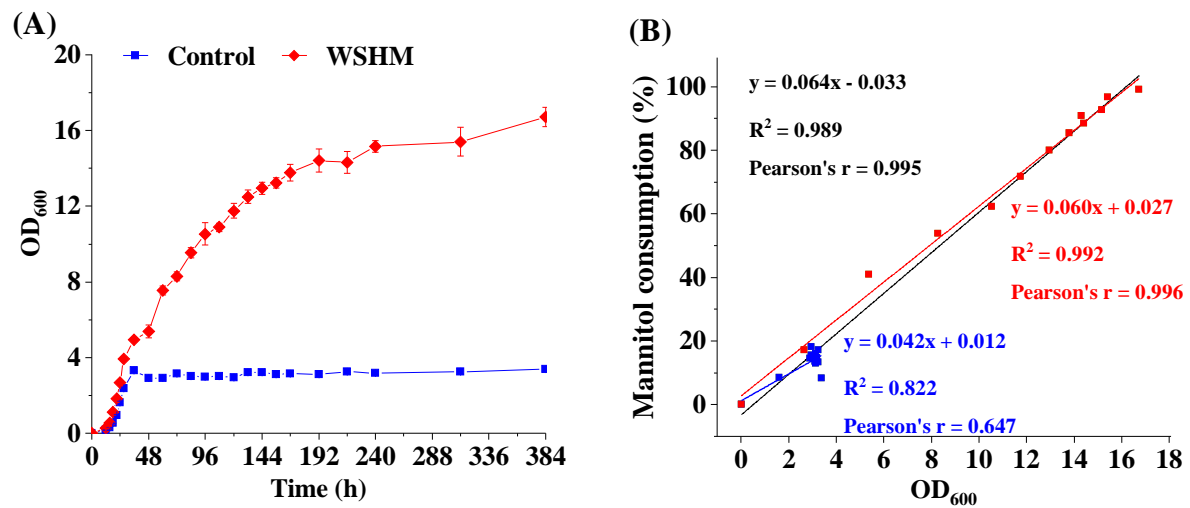

**Fig. S2.** Effects of WSHM on the growth and carbon source utilization efficiency of *S. fredii* CCBAU45436. (A) Effects of WSHM on the growth. (B) Correlations between mannitol consumption and OD<sub>600</sub>. Blue, red and black represent samples collected from YM broth or YM broth supplied with 0.5 g/L WSHM and all, respectively. The linear model between mannitol consumption and OD<sub>600</sub> were shown.

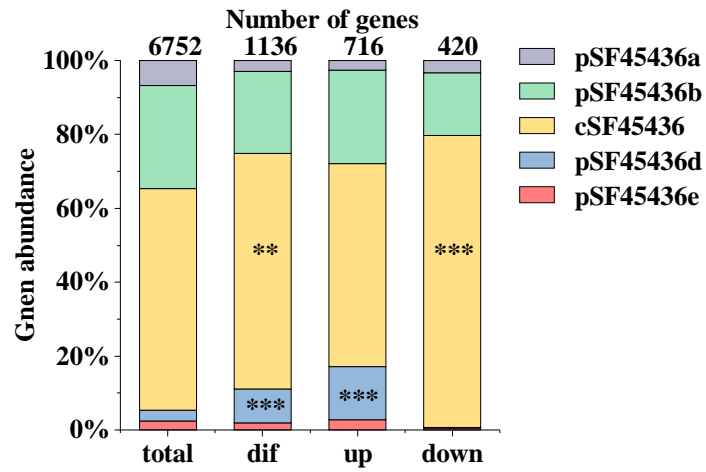

**Fig. S3.** Distribution of genes among replicons; total: all genes of *S. fredii* CCBAU45436, dif: differentially expressed genes, up: up-regulated genes, down: down-regulated genes; (Fisher's exact test with FDR correction, \*\*,  $\text{padj} < 0.01$ ; \*\*\*,  $\text{padj} < 0.001$ , only significantly enriched gene cluster were marked).

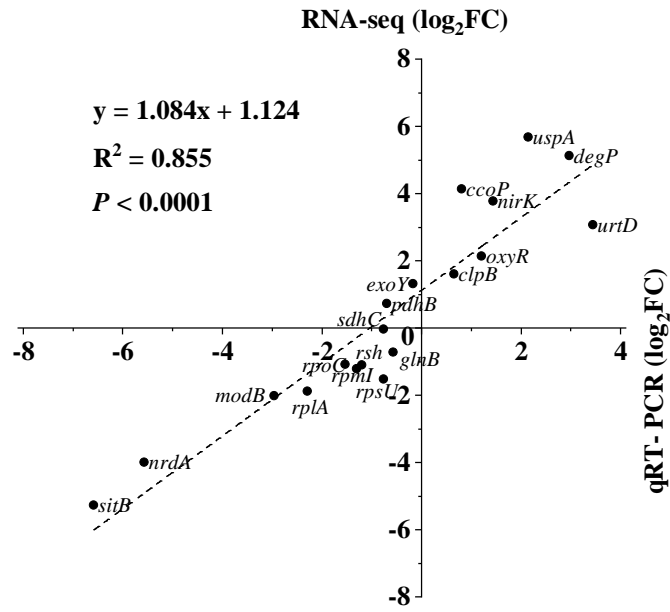

**Fig. S4.** Comparisons of fold change values ( $\log_2FC$ ) of selected genes from the different functional categories measured by qRT-PCR and RNA-Seq. The  $R^2$  indicates the square of Pearson's correlation coefficient  $r$ .

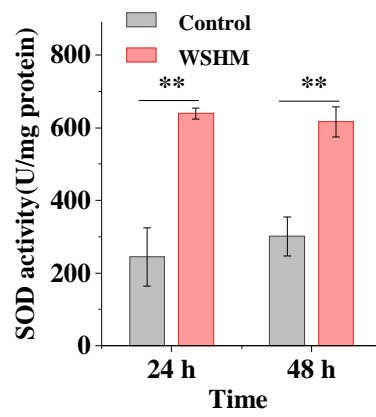

**Fig. S5.** Effects of WSHM on superoxide dismutase activity of *S. fredii* CCBAU45436 at 24 h and 48 h; (t-test, \*\*,  $P < 0.01$ ). The data are presented as the means  $\pm$  standard deviations from triplicate experiments.

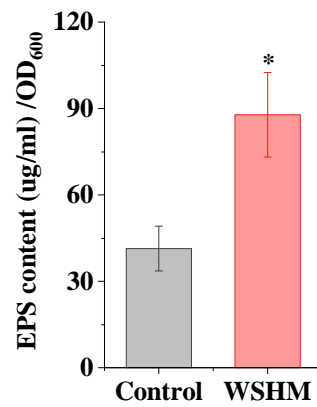

**Fig. S6.** Effects of WSHM on exopolysaccharides (EPS) production of *S. fredii* CCBAU45436 at 24 h; (t-test, \*,  $P < 0.05$ ). The data are presented as the means  $\pm$  standard deviations from triplicate experiments.

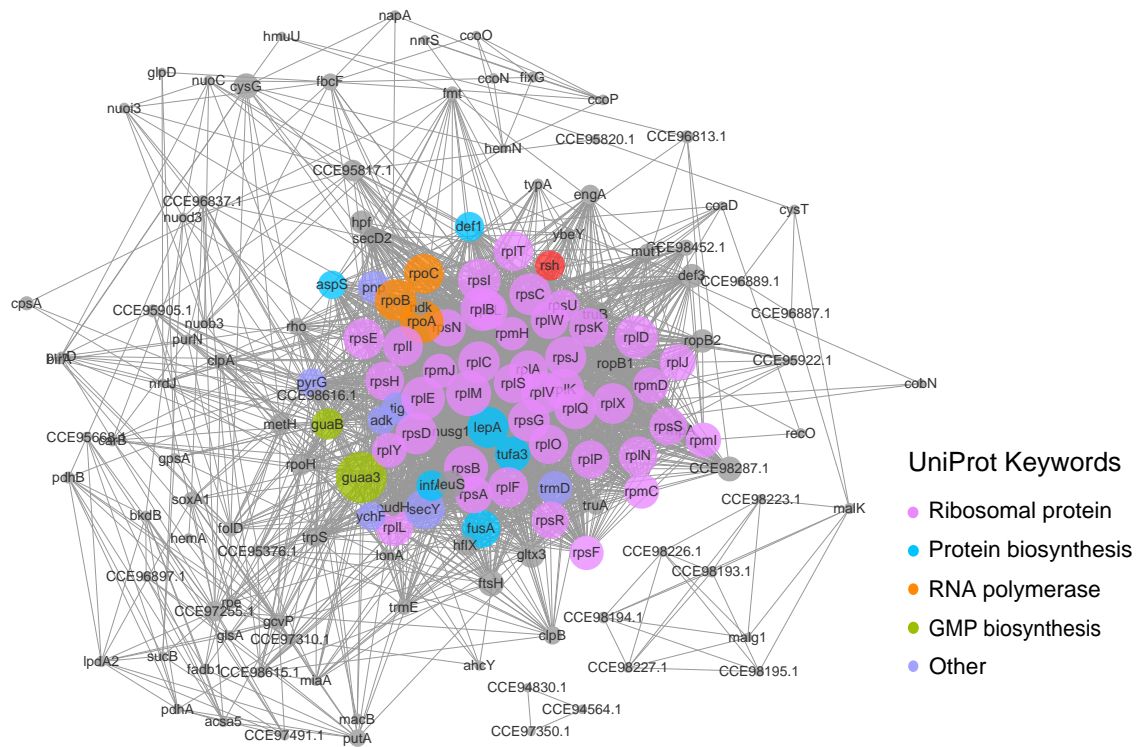

**Fig. S7.** STRING protein-protein interaction network for the significant differentially expressed genes, only the node with degree  $> 10$  were shown. The size of the node is proportional to the degree, and nodes with degree  $\geq 50$  are colored according to the UniProt Keywords of protein expect *rsh* gene was shown in red.

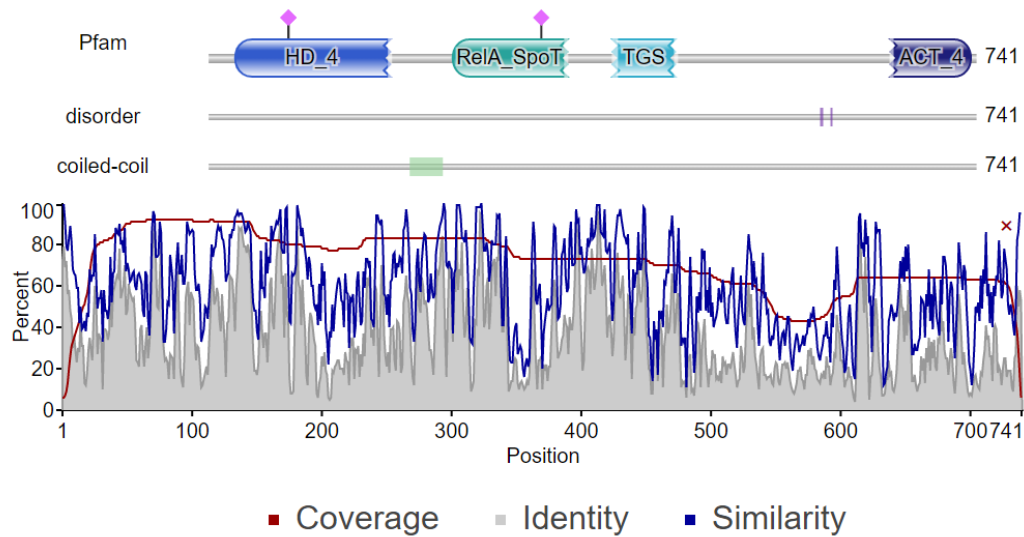

**Fig. S8.** Sequence matches and features of the *S. fredii* CCBAU45436 RSH protein against the Pfam database. HD: hydrolase domain; RelA-SpoT: predicted RelA-SpoT ppGpp synthase domain; TGS: Threonyl-tRNA synthetase, GTPase and SpoT; ACT: Aspartokinase, Chorismate mutase and TyrR.



**Table S1.** Data quality of RNA-Seq datasets and genomic alignment results of sequencing reads

| <b>Sample name</b> | <b>Raw reads</b> | <b>Clean reads</b> | <b>Q20(%)</b> | <b>Q30(%)</b> | <b>Total mapped</b> | <b>Uniquely mapped</b> |
|--------------------|------------------|--------------------|---------------|---------------|---------------------|------------------------|
| Control1           | 19532312         | 19005078           | 98.39         | 94.91         | 18790049<br>98.87%  | 18122679<br>95.36%     |
| Control2           | 17384566         | 17185396           | 98.82         | 96.08         | 16947252<br>98.61   | 16269213<br>94.67%     |
| Control3           | 14259850         | 14096340           | 98.81         | 96.04         | 13922282<br>98.77%  | 13394195<br>95.02%     |
| WSHM1              | 14957640         | 14779534           | 98.82         | 96.08         | 14585780<br>98.69%  | 14225887<br>96.25%     |
| WSHM2              | 20254278         | 20034488           | 98.82         | 96.06         | 19777881<br>98.72%  | 19282765<br>96.25%     |
| WSHM3              | 14233518         | 13882542           | 98.5          | 95.22         | 13733661<br>98.93%  | 13406660<br>96.57%     |

**Table S2.** Distribution of genes among replicons, p-adjust: Fisher's exact test with FDR correction.

The p-adjust of significantly enriched gene cluster were bold.

| replicons | total gene | DEG  | % of dif | p-adjust       | up-regulated | % of up | p-adjust       | down-regulated | % of down | p-adjust       |
|-----------|------------|------|----------|----------------|--------------|---------|----------------|----------------|-----------|----------------|
| pSF45436a | 452        | 33   | 2.90%    | 3.6E-09        | 19           | 2.65%   | 1.7E-06        | 14             | 3.33%     | 0.00405        |
| pSF45436b | 1888       | 252  | 22.18%   | 2.3E-06        | 181          | 25.28%  | 0.14           | 71             | 16.90%    | 1.5 E-07       |
| cSF45436  | 4051       | 725  | 63.82%   | <b>0.00484</b> | 393          | 54.89%  | 0.00902        | 332            | 79.05%    | <b>6.7E-17</b> |
| pSF45436d | 203        | 104  | 9.15%    | <b>1.1E-29</b> | 103          | 14.39%  | <b>6.5E-48</b> | 1              | 0.24%     | 7.6E-05        |
| pSF45436e | 158        | 22   | 1.94%    | 0.38886        | 20           | 2.79%   | 0.36041        | 2              | 0.48%     | 0.00416        |
| sum       | 6752       | 1136 | 100.00%  |                | 716          | 100.00% |                | 420            | 100.00%   |                |

**Table S3.** Genes selected from different functional categories and gene-specific primers for qRT-PCR analysis

| Gene ID       | Gene name   | Primer (5'-3')                                    | Functional categories          | Gene production                                                       |
|---------------|-------------|---------------------------------------------------|--------------------------------|-----------------------------------------------------------------------|
| AB395_RS18320 | 16S         | GTGATAAGCCGAGAGGAAGGT<br>CCTACTGTCACCACCATTGTAG   |                                | 16S rRNA gene (the reference)                                         |
| AB395_RS04425 | <i>uspA</i> | AGGAGGTTCTCAATCAGCAT<br>ATCATCGCCTTCGTCACA        |                                | Universal stress protein UspA and related nucleotide-binding proteins |
| AB395_RS32460 | <i>degP</i> | TCGCTTACGGAGAATACA<br>GTTACAGACAAGCCTTAG          | stress response genes          | Trypsin-like serine proteases                                         |
| AB395_RS02005 | <i>oxyR</i> | TCTGGTGCCGCAACTCATTC<br>CCTGTCCGTCAGCGATTCC       |                                | Hydrogen peroxide-inducible genes activator                           |
| AB395_RS13640 | <i>clpB</i> | AATACGAGCAGCACCACAAGG<br>CCGTGATGTAGCGATTGGATAGG  |                                | ATP-dependent chaperone ClpB                                          |
| AB395_RS23120 | <i>exoY</i> | CCGCAACGATGTGTCCTA<br>CTTGAAGACGATGACGAGGT        |                                | Exopolysaccharide biosynthesis polyprenyl glycosyl phosphotransferase |
| AB395_RS05810 | <i>pdhB</i> | GCTCTCCAAGTGGCTGAA<br>CTCCATCGTCGCCTGTGTC         | carbon metabolism              | pyruvate dehydrogenase complex E1 component subunit beta              |
| AB395_RS16895 | <i>sdhC</i> | CTCTCGCCGCATCTTCAA<br>CACCAGGCAACCAGGATC          |                                | succinate dehydrogenase, cytochrome b556 subunit                      |
| AB395_RS08875 | <i>ccoP</i> | CCTCGCTGGTGGGTCTAC<br>CTTCGTCGCATCCGTC AAC        |                                | Cbb3-type cytochrome c oxidase subunit                                |
| AB395_RS04540 | <i>nirK</i> | GCGGAGCAGGACTTCTATGT<br>TTCCAGCGTATCGGCGTAG       |                                | Copper-containing nitrite reductase                                   |
| AB395_RS21215 | <i>urtD</i> | AACTCGCTCTCCTTCATC<br>GTCCATCATCGTCGTCTT          | nitrogen metabolism            | urea ABC transporter ATP-binding protein UrtD                         |
| AB395_RS07010 | <i>glnB</i> | CGGACGAGAATGCGGAAG<br>TGCGGATTCGGATCACTT          |                                | nitrogen regulatory protein P-II                                      |
| AB395_RS05290 | <i>rpoC</i> | AGATTCGTGGTCGCTACAAG<br>GGTTCTTCGGCAGGAGTT        |                                | DNA-directed RNA polymerase subunit beta'                             |
| AB395_RS19775 | <i>rpmI</i> | AGCGTTCCAACAAGTTCATTC<br>CGTTCGGCAGGTAGTTCT       | genetic information processing | 50S ribosomal protein L35                                             |
| AB395_RS15575 | <i>rpsU</i> | GCAGGTACTTGTCCGCGATAAC<br>TGCGACGGCTTTTCATAGAAGTC |                                | 30S ribosomal protein S21                                             |
| AB395_RS05270 | <i>rplA</i> | GCATTGATCCGGTGAAGG<br>GAGATTCATCGCCACTTCG         |                                | 50S ribosomal protein L1                                              |
| AB395_RS29160 | <i>nrpA</i> | TCGCTGACGCTGTTCTTC<br>ATGGTCTTGATGCCCTTCTT        |                                | class 1b ribonucleoside-diphosphate reductase subunit alpha           |
| AB395_RS03645 | <i>rsh</i>  | GAGGAGGAACTGAGCGAACTG<br>GCGGAAGACGGAATAGGGTTT    | others                         | bifunctional (p)ppGpp synthetase/hydrolase                            |

|               |             |                                                  |                                                    |
|---------------|-------------|--------------------------------------------------|----------------------------------------------------|
| AB395_RS15960 | <i>modB</i> | GTGCTGCTCATCCTGTTC<br>AGCGGAAGGAAAAGACAAG        | molybdate ABC transporter permease subunit         |
| AB395_RS12150 | <i>tonB</i> | TACGCTTTACTGTCACATCCAAT<br>GCTGCCTGGTCGAGAATT    | Periplasmic protein TonB                           |
| AB395_RS16720 | <i>sitB</i> | CTGAAGAAGAATCTCGTCGCCTAT<br>GCCCATCATCACCACATCCT | manganese/iron ABC transporter ATP-binding protein |

---

**Table S4.** Description of genes in Fig. 4

| Gene ID       | Gene name   | Log <sub>2</sub> FC | P-adjust  | Gene production                                                                                                                               |
|---------------|-------------|---------------------|-----------|-----------------------------------------------------------------------------------------------------------------------------------------------|
| AB395_RS12225 | <i>mtlK</i> | -0.23               | 0.4309881 | Multiple polyol-specific dehydrogenase (EC 1.1.1.-)                                                                                           |
| AB395_RS15790 | <i>xylA</i> | 0.01                | 0.9895518 | Xylose isomerase (EC 5.3.1.5)                                                                                                                 |
| AB395_RS16435 | <i>frk</i>  | -0.73               | 0.0093495 | ROK family Glucokinase with ambiguous substrate specificity                                                                                   |
| AB395_RS00575 | <i>frk</i>  | -0.15               | 0.6709546 | Fructokinase (EC 2.7.1.4)                                                                                                                     |
| AB395_RS25675 | <i>fbp</i>  | 1.61                | 7.101E-08 | Fructose-1,6-bisphosphatase2C type I (EC 3.1.3.11)                                                                                            |
| AB395_RS10390 | <i>pfp</i>  | 0.80                | 0.0009494 | Pyrophosphate-dependent fructose 6-phosphate-1-kinase (EC 2.7.1.90)                                                                           |
| AB395_RS32620 | <i>pfp</i>  | 4.66                | 5.244E-61 | Tagatose-6-phosphate kinase (EC 2.7.1.144) / 1-phosphofructokinase (EC 2.7.1.56)                                                              |
| AB395_RS15055 | <i>fba</i>  | 1.80                | 1.906E-14 | Fructose-bisphosphate aldolase class I (EC 4.1.2.13)                                                                                          |
| AB395_RS24590 | <i>fba</i>  | -0.45               | 0.1057599 | Fructose-bisphosphate aldolase class II (EC 4.1.2.13)                                                                                         |
| AB395_RS25690 | <i>fba</i>  | 1.92                | 7.32E-11  | Fructose-bisphosphate aldolase class II (EC 4.1.2.13)                                                                                         |
| AB395_RS32440 | <i>glk</i>  | 3.39                | 4.334E-60 | Glucokinase (EC 2.7.1.2)                                                                                                                      |
| AB395_RS32660 | <i>glk</i>  | 2.82                | 9.941E-17 | Glucokinase like protein                                                                                                                      |
| AB395_RS18785 | <i>glk</i>  | -0.55               | 0.0499549 | Glucokinase (EC 2.7.1.2)                                                                                                                      |
| AB395_RS00585 | <i>pgi</i>  | -0.29               | 0.3361126 | Glucose-6-phosphate isomerase (EC 5.3.1.9)                                                                                                    |
| AB395_RS01690 | <i>zwf</i>  | -0.48               | 0.0752833 | Glucose-6-phosphate 1-dehydrogenase (EC 1.1.1.49)                                                                                             |
| AB395_RS01685 | <i>pgl</i>  | -0.35               | 0.2497178 | 6-phosphogluconolactonase (EC 3.1.1.31)2C eukaryotic type                                                                                     |
| AB395_RS01680 | <i>edd</i>  | 0.07                | 0.8659079 | Phosphogluconate dehydratase (EC 4.2.1.12)                                                                                                    |
| AB395_RS15725 | <i>eda</i>  | -0.49               | 0.1408175 | 4-Hydroxy-2-oxoglutarate aldolase (EC 4.1.3.16) & 2-dehydro-3-deoxyphosphogluconate aldolase (EC 4.1.2.14)                                    |
| AB395_RS08835 | <i>gnd</i>  | -0.28               | 0.3675601 | 6-phosphogluconate dehydrogenase2C decarboxylating (EC 1.1.1.44)                                                                              |
| AB395_RS25710 | <i>rpe</i>  | 1.06                | 0.0051373 | Ribulose-phosphate 3-epimerase (EC 5.1.3.1)                                                                                                   |
| AB395_RS07520 | <i>rpe</i>  | -0.48               | 0.1355813 | Ribulose-phosphate 3-epimerase (EC 5.1.3.1)                                                                                                   |
| AB395_RS08395 | <i>rpi</i>  | -0.59               | 0.0296624 | Ribose 5-phosphate isomerase A (EC 5.3.1.6)                                                                                                   |
| AB395_RS23580 | <i>rpi</i>  | 0.07                | 0.880628  | Ribose 5-phosphate isomerase B (EC 5.3.1.6)                                                                                                   |
| AB395_RS32855 | <i>xfp</i>  | 4.27                | 6.022E-69 | Xylulose-5-phosphate phosphoketolase (EC 4.1.2.9) & Fructose-6-phosphate phosphoketolase (EC 4.1.2.22)                                        |
| AB395_RS25360 | <i>tkt</i>  | -0.13               | 0.7609231 | Transketolase2C N-terminal section (EC 2.2.1.1)                                                                                               |
| AB395_RS25365 | <i>tkt</i>  | -0.08               | 0.8900902 | Transketolase2C C-terminal section (EC 2.2.1.1)                                                                                               |
| AB395_RS15035 | <i>tkt</i>  | -0.43               | 0.0896349 | Transketolase (EC 2.2.1.1)                                                                                                                    |
| AB395_RS25685 | <i>tkt</i>  | 1.78                | 2.497E-12 | Transketolase (EC 2.2.1.1)                                                                                                                    |
| AB395_RS16790 | <i>tal</i>  | 0.18                | 0.5432929 | Transaldolase (EC 2.2.1.2)                                                                                                                    |
| AB395_RS11385 | <i>tal</i>  | -0.26               | 0.6834022 | Transaldolase (EC 2.2.1.2)                                                                                                                    |
| AB395_RS11300 | <i>prsA</i> | -0.95               | 0.0001463 | Ribose-phosphate pyrophosphokinase (EC 2.7.6.1)                                                                                               |
| AB395_RS32630 | <i>prsA</i> | 4.93                | 1.805E-79 | Ribose-phosphate pyrophosphokinase (EC 2.7.6.1)                                                                                               |
| AB395_RS15040 | <i>gap</i>  | 0.12                | 0.720159  | NADPH-dependent glyceraldehyde-3-phosphate dehydrogenase (EC 1.2.1.13) / NAD-dependent glyceraldehyde-3-phosphate dehydrogenase (EC 1.2.1.12) |
| AB395_RS15050 | <i>pgk</i>  | -0.27               | 0.372946  | Phosphoglycerate kinase (EC 2.7.2.3)                                                                                                          |

|               |             |       |           |                                                                                                           |
|---------------|-------------|-------|-----------|-----------------------------------------------------------------------------------------------------------|
| AB395_RS18800 | <i>gpm</i>  | -0.36 | 0.2381711 | Phosphoglycerate mutase (EC 5.4.2.1)                                                                      |
| AB395_RS02695 | <i>gpm</i>  | -1.15 | 3.781E-05 | Phosphoglycerate mutase family                                                                            |
| AB395_RS05795 | <i>eno</i>  | -0.13 | 0.7015901 | Enolase (EC 4.2.1.11)                                                                                     |
| AB395_RS15210 | <i>pyk</i>  | -0.69 | 0.0061332 | Pyruvate kinase (EC 2.7.1.40)                                                                             |
| AB395_RS32655 | <i>pps</i>  | 3.58  | 9.417E-36 | Phosphoenolpyruvate synthase (EC 2.7.9.2)                                                                 |
| AB395_RS02910 | <i>pps</i>  | -0.07 | 0.8134841 | Pyruvatephosphate dikinase (EC 2.7.9.1)                                                                   |
| AB395_RS05805 | <i>pdh</i>  | 0.87  | 0.000561  | Pyruvate dehydrogenase E1 component alpha subunit (EC 1.2.4.1)                                            |
| AB395_RS05810 | <i>pdh</i>  | 0.73  | 0.0032949 | Pyruvate dehydrogenase E1 component beta subunit (EC 1.2.4.1)                                             |
| AB395_RS32330 | <i>pdh</i>  | 2.02  | 3.244E-17 | Pyruvate dehydrogenase E1 component alpha subunit (EC 1.2.4.1)                                            |
| AB395_RS32335 | <i>pdh</i>  | 2.11  | 2.893E-17 | Pyruvate dehydrogenase E1 component beta subunit (EC 1.2.4.1)                                             |
| AB395_RS18180 | <i>pckA</i> | 1.18  | 2.524E-08 | Phosphoenolpyruvate carboxykinase [ATP] (EC 4.1.1.49)                                                     |
| AB395_RS21690 | <i>gltA</i> | 0.57  | 0.0359065 | Citrate synthase (si) (EC 2.3.3.1)                                                                        |
| AB395_RS06120 | <i>gltA</i> | 0.56  | 0.0318637 | Citrate synthase (si) (EC 2.3.3.1)                                                                        |
| AB395_RS27600 | <i>acnA</i> | -0.23 | 0.4264916 | Aconitate hydratase (EC 4.2.1.3)                                                                          |
| AB395_RS17375 | <i>acnA</i> | 0.15  | 0.5658562 | Aconitate hydratase (EC 4.2.1.3)                                                                          |
| AB395_RS08090 | <i>icd</i>  | -1.19 | 3.139E-07 | Isocitrate dehydrogenase [NADP] (EC 1.1.1.42)                                                             |
| AB395_RS16840 | <i>sucA</i> | 0.38  | 0.1176081 | 2-oxoglutarate dehydrogenase E1 component (EC 1.2.4.2)                                                    |
| AB395_RS16835 | <i>sucB</i> | 0.23  | 0.435535  | Dihydrolipoamide succinyltransferase component (E2) of 2-oxoglutarate dehydrogenase complex (EC 2.3.1.61) |
| AB395_RS05830 | <i>lpd</i>  | 0.76  | 0.0031442 | Dihydrolipoamide dehydrogenase of pyruvate dehydrogenase complex (EC 1.8.1.4)                             |
| AB395_RS15995 | <i>lpd</i>  | 1.67  | 9.887E-14 | Dihydrolipoamide dehydrogenase of branched-chain alpha-keto acid dehydrogenase (EC 1.8.1.4)               |
| AB395_RS16815 | <i>lpd</i>  | 0.32  | 0.2140103 | Dihydrolipoamide dehydrogenase of 2-oxoglutarate dehydrogenase (EC 1.8.1.4)                               |
| AB395_RS05815 | <i>lpd</i>  | 0.68  | 0.0091526 | Dihydrolipoamide acetyltransferase component of pyruvate dehydrogenase complex (EC 2.3.1.12)              |
| AB395_RS32340 | <i>lpd</i>  | 1.60  | 7.382E-10 | Dihydrolipoamide acetyltransferase component of pyruvate dehydrogenase complex (EC 2.3.1.12)              |
| AB395_RS15525 | <i>pgm</i>  | 1.03  | 2.422E-05 | Phosphoglucomutase (EC 5.4.2.2)                                                                           |
| AB395_RS08840 | <i>ccoS</i> | 1.81  | 0.0010779 | Type cbb3 cytochrome oxidase biogenesis protein CcoS involved in heme b insertion                         |
| AB395_RS08845 | <i>ccoI</i> | 4.12  | 1.375E-60 | Type cbb3 cytochrome oxidase biogenesis protein CcoI Copper-translocating P-type ATPase (EC 3.6.3.4)      |
| AB395_RS08850 | <i>ccoH</i> | 5.10  | 1.892E-67 | Type cbb3 cytochrome oxidase biogenesis protein CcoH                                                      |
| AB395_RS08855 | <i>ccoG</i> | 5.23  | 5.028E-79 | Type cbb3 cytochrome oxidase biogenesis protein CcoG                                                      |
| AB395_RS08875 | <i>ccoP</i> | 4.13  | 3.993E-58 | Cytochrome c oxidase subunit CcoP (EC 1.9.3.1)                                                            |
| AB395_RS08880 | <i>ccoQ</i> | 3.08  | 7.577E-10 | Cytochrome c oxidase subunit CcoQ (EC 1.9.3.1)                                                            |
| AB395_RS08885 | <i>ccoO</i> | 4.41  | 2.215E-45 | Cytochrome c oxidase subunit CcoO (EC 1.9.3.1)                                                            |
| AB395_RS08890 | <i>ccoN</i> | 5.06  | 9.709E-89 | Cytochrome c oxidase subunit CcoN (EC 1.9.3.1)                                                            |
| AB395_RS04840 | <i>nuoA</i> | 0.41  | 0.2492021 | NADH ubiquinone oxidoreductase chain A (EC 1.6.5.3)                                                       |
| AB395_RS04845 | <i>nuoB</i> | 0.40  | 0.1284137 | NADH-ubiquinone oxidoreductase chain B (EC 1.6.5.3)                                                       |
| AB395_RS04850 | <i>nuoC</i> | 0.41  | 0.1074975 | NADH-ubiquinone oxidoreductase chain C (EC 1.6.5.3)                                                       |
| AB395_RS04855 | <i>nuoD</i> | 0.59  | 0.0240792 | NADH-ubiquinone oxidoreductase chain D (EC 1.6.5.3)                                                       |

|               |             |       |           |                                                          |
|---------------|-------------|-------|-----------|----------------------------------------------------------|
| AB395_RS04865 | <i>nuoE</i> | 0.62  | 0.0088352 | NADH-ubiquinone oxidoreductase chain E (EC 1.6.5.3)      |
| AB395_RS04870 | <i>nuoF</i> | 0.41  | 0.1176949 | NADH-ubiquinone oxidoreductase chain F (EC 1.6.5.3)      |
| AB395_RS04885 | <i>nuoH</i> | 0.29  | 0.3228827 | NADH-ubiquinone oxidoreductase chain H (EC 1.6.5.3)      |
| AB395_RS04890 | <i>nuoI</i> | 0.19  | 0.5246981 | NADH-ubiquinone oxidoreductase chain I (EC 1.6.5.3)      |
| AB395_RS04895 | <i>nuoJ</i> | 0.26  | 0.3385803 | NADH-ubiquinone oxidoreductase chain J (EC 1.6.5.3)      |
| AB395_RS04900 | <i>nuoK</i> | -0.04 | 0.9198044 | NADH-ubiquinone oxidoreductase chain K (EC 1.6.5.3)      |
| AB395_RS04905 | <i>nuoL</i> | 0.01  | 0.9899626 | NADH-ubiquinone oxidoreductase chain L (EC 1.6.5.3)      |
| AB395_RS04910 | <i>nuoM</i> | -0.02 | 0.9673037 | NADH-ubiquinone oxidoreductase chain M (EC 1.6.5.3)      |
| AB395_RS04915 | <i>nuoN</i> | 0.03  | 0.9230476 | NADH-ubiquinone oxidoreductase chain N (EC 1.6.5.3)      |
| AB395_RS10830 | <i>nuoH</i> | 0.54  | 0.0223183 | NADH-ubiquinone oxidoreductase chain H (EC 1.6.5.3)      |
| AB395_RS10835 | <i>nuoI</i> | 1.27  | 5.217E-05 | NADH-ubiquinone oxidoreductase chain I (EC 1.6.5.3)      |
| AB395_RS10845 | <i>nuoG</i> | 0.94  | 0.00019   | NADH-ubiquinone oxidoreductase chain G (EC 1.6.5.3)      |
| AB395_RS10850 | <i>nuoF</i> | 0.97  | 0.0019513 | NADH-ubiquinone oxidoreductase chain F (EC 1.6.5.3)      |
| AB395_RS10855 | <i>nuoE</i> | 1.57  | 0.0027839 | NADH-ubiquinone oxidoreductase chain E (EC 1.6.5.3)      |
| AB395_RS10860 | <i>nuoD</i> | 1.24  | 2.233E-06 | NADH-ubiquinone oxidoreductase chain D (EC 1.6.5.3)      |
| AB395_RS10865 | <i>nuoC</i> | 1.89  | 1.602E-07 | NADH-ubiquinone oxidoreductase chain C (EC 1.6.5.3)      |
| AB395_RS10870 | <i>nuoB</i> | 2.04  | 9.417E-09 | NADH-ubiquinone oxidoreductase chain B (EC 1.6.5.3)      |
| AB395_RS10875 | <i>nuoA</i> | 1.76  | 4.578E-07 | NADH ubiquinone oxidoreductase chain A (EC 1.6.5.3)      |
| AB395_RS10880 | <i>nuoN</i> | 0.17  | 0.6633655 | NADH-ubiquinone oxidoreductase chain N (EC 1.6.5.3)      |
| AB395_RS10885 | <i>nuoM</i> | 0.20  | 0.6270663 | NADH-ubiquinone oxidoreductase chain M (EC 1.6.5.3)      |
| AB395_RS10900 | <i>mnhD</i> | 0.28  | 0.5006408 | NADH-ubiquinone oxidoreductase chain L (EC 1.6.5.3)      |
| AB395_RS10905 | <i>nuoK</i> | 0.64  | 0.4893503 | NADH-ubiquinone oxidoreductase chain K (EC 1.6.5.3)      |
| AB395_RS10910 | <i>nuoJ</i> | 0.74  | 0.0071658 | NADH-ubiquinone oxidoreductase chain J (EC 1.6.5.3)      |
| AB395_RS23060 | <i>exoP</i> | 1.21  | 3.337E-07 | Succinoglycan biosynthesis transport protein exoP        |
| AB395_RS23065 | <i>exoN</i> | 1.57  | 5.587E-12 | UTP-glucose-1-phosphate uridylyltransferase (EC 2.7.7.9) |
| AB395_RS00880 | <i>galE</i> | 2.15  | 1.444E-34 | UDP-glucose 4-epimerase (EC 5.1.3.2)                     |
| AB395_RS23070 | <i>exoO</i> | 1.22  | 6.976E-08 | Succinoglycan biosynthesis protein ExoO                  |
| AB395_RS23075 | <i>exoM</i> | 1.26  | 9.182E-08 | Succinoglycan biosynthesis protein ExoM                  |
| AB395_RS23080 | <i>exoA</i> | 1.29  | 5.612E-09 | Succinoglycan biosynthesis protein ExoA                  |
| AB395_RS23085 | <i>exoL</i> | 1.54  | 1.493E-12 | Succinoglycan biosynthesis protein ExoL                  |
| AB395_RS23090 | <i>exoK</i> | 2.05  | 1.407E-21 | Endo-beta-1,3-1,4 glucanase (EC 3.2.1.73)                |
| AB395_RS23105 | <i>exol</i> | 0.59  | 0.027931  | putative periplasmic protein                             |
| AB395_RS23110 | <i>exoU</i> | 1.44  | 1.128E-11 | Succinoglycan biosynthesis protein ExoU                  |
| AB395_RS23115 | <i>exoX</i> | 1.22  | 0.0073245 | Exopolysaccharide production repressor protein           |
| AB395_RS23120 | <i>exoY</i> | 1.31  | 1.316E-09 | Exopolysaccharide biosynthesis protein                   |
| AB395_RS24220 | <i>nrtC</i> | 2.46  | 5.981E-17 | Nitrate ABC transporter ATP-binding protein              |
| AB395_RS24225 | <i>nrtB</i> | 2.11  | 5.959E-10 | Bicarbonate transport system permease protein            |
| AB395_RS24230 | <i>nrtA</i> | 2.18  | 8.217E-12 | Nitrate ABC transporter nitrate-binding protein          |
| AB395_RS21200 | <i>urtA</i> | 2.21  | 2.89E-17  | urea ABC transporter substrate-binding protein           |
| AB395_RS21205 | <i>urtB</i> | 2.61  | 3.214E-25 | urea ABC transporter permease subunit UrtB               |
| AB395_RS21210 | <i>urtC</i> | 2.97  | 3.983E-39 | urea ABC transporter permease subunit UrtC               |
| AB395_RS21215 | <i>urtD</i> | 3.07  | 4.731E-31 | urea ABC transporter ATP-binding protein UrtD            |
| AB395_RS21220 | <i>urtE</i> | 3.42  | 4.016E-52 | urea ABC transporter ATP-binding subunit UrtE            |

|               |             |       |           |                                                              |
|---------------|-------------|-------|-----------|--------------------------------------------------------------|
| AB395_RS04560 | <i>napE</i> | 3.34  | 9.481E-27 | Periplasmic nitrate reductase component NapE                 |
| AB395_RS04565 | <i>napF</i> | 2.24  | 2.215E-20 | Ferredoxin-type protein NapF (periplasmic nitrate reductase) |
| AB395_RS04570 | <i>napD</i> | 1.80  | 0.0046529 | Periplasmic nitrate reductase component NapD                 |
| AB395_RS04575 | <i>napA</i> | 2.02  | 4.6E-27   | Periplasmic nitrate reductase precursor (EC 1.7.99.4)        |
| AB395_RS04580 | <i>napB</i> | 1.88  | 6.78E-12  | Nitrate reductase cytochrome c550-type subunit               |
| AB395_RS04585 | <i>napC</i> | 1.53  | 9.234E-11 | Cytochrome c-type protein NapC                               |
| AB395_RS26435 | <i>nasA</i> | 0.81  | 0.0197989 | Assimilatory nitrate reductase large subunit (EC:1.7.99.4)   |
| AB395_RS04535 | <i>nnrS</i> | 3.56  | 2.219E-32 | NnrS protein involved in response to NO                      |
| AB395_RS04540 | <i>nirK</i> | 3.77  | 1.707E-59 | Copper-containing nitrite reductase (EC 1.7.2.1)             |
| AB395_RS04545 | <i>nirV</i> | 2.32  | 1.074E-18 | Nitrite reductase accessory protein NirV                     |
| AB395_RS04550 | <i>nnrR</i> | 0.18  | 0.5852129 | Nitric oxide -responding transcriptional regulator NnrR      |
| AB395_RS26425 | <i>nirB</i> | -0.54 | 0.4524857 | Nitrite reductase [NAD(P)H] large subunit (EC 1.7.1.4)       |
| AB395_RS26430 | <i>nirD</i> | 0.84  | 0.0165051 | Nitrite reductase [NAD(P)H] small subunit (EC 1.7.1.4)       |
| AB395_RS08065 | <i>glsA</i> | -1.36 | 2.421E-05 | Glutaminase (EC 3.5.1.2)                                     |
| AB395_RS21835 | <i>glnA</i> | 1.39  | 4.45E-10  | Glutamine synthetase type II (EC 6.3.1.2)                    |
| AB395_RS27410 | <i>glnA</i> | -0.24 | 0.5860045 | Glutamine synthetase type I (EC 6.3.1.2)                     |
| AB395_RS01700 | <i>glnA</i> | 0.49  | 0.0296624 | glutamine synthetase family protein                          |
| AB395_RS07005 | <i>glnA</i> | -0.11 | 0.7735058 | Glutamine synthetase type I (EC 6.3.1.2)                     |
| AB395_RS10505 | <i>glnA</i> | 0.51  | 0.0701031 | glutamine synthetase family protein                          |
| AB395_RS26035 | <i>gdhA</i> | 0.42  | 0.2775176 | glutamate dehydrogenase                                      |
| AB395_RS12345 | <i>ureG</i> | 1.06  | 8.612E-05 | Urease accessory protein UreG                                |
| AB395_RS12350 | <i>ureF</i> | -0.17 | 0.6804141 | Urease accessory protein UreF                                |
| AB395_RS12355 | <i>ureE</i> | 0.29  | 0.3221612 | Urease accessory protein UreE                                |

---



**Table S5.** Strains, plasmids and primers used in this study

|                                        | Relevant characteristics                                                                                                                | Note      |
|----------------------------------------|-----------------------------------------------------------------------------------------------------------------------------------------|-----------|
| <b>Strains</b>                         |                                                                                                                                         |           |
| <i>E. coli</i> DH5 $\alpha$            | F- $\phi$ 80 lac Z $\Delta$ M15 $\Delta$ (lacZYA-arg F) U169 endA1 recA1<br>hsdR17(rk-,mk+) supE44 $\lambda$ - thi -1 gyrA96 relA1 phoA | Biomed    |
| <i>S. fredii</i> CCBAU45436            | <i>S. fredii</i> CCBAU45436 wild type, NA <sup>r</sup> , TMP <sup>r</sup>                                                               | (1)       |
| $\Delta$ <i>rsh</i>                    | <i>S. fredii</i> CCBAU45436 <i>rsh</i> in-frame deletion, NA <sup>r</sup> , TMP <sup>r</sup>                                            | This work |
| <b>Plasmids</b>                        |                                                                                                                                         |           |
| pJQ200SK                               | suicide plasmid with sacB selectable marker, Gm <sup>r</sup>                                                                            | (2)       |
| pRK2013                                | Helper plasmid, IncP, Tra <sup>+</sup> , Mob <sup>+</sup> , ColE1, Km <sup>r</sup>                                                      | (3)       |
| <b>Primers for <i>rsh</i> deletion</b> |                                                                                                                                         |           |
| rsh-UF                                 | ATCGAATTCCTGCAGCCCTCCGGTTTCGTGTCGTTAATC                                                                                                 |           |
| rsh-UR                                 | AATTCCTTGACTCGTATTGGCGCATCATTC                                                                                                          |           |
| rsh-DF                                 | CCAATACGAGTCAAGGAATTGCCGAGCATC                                                                                                          |           |
| rsh-DR                                 | AGAACTAGTGGATCCCCCTTGATGGGCGCAAGATATGC                                                                                                  |           |
| rsh-WF                                 | CATCGCGGAAATGTCGTATTC                                                                                                                   |           |
| rsh-WR                                 | CCGTCATCGCATCTTGAAAC                                                                                                                    |           |

## References

1. Zhang YM, Li Y, Jr., Chen WF, Wang ET, Tian CF, Li QQ, Zhang YZ, Sui XH, Chen WX. 2011. Biodiversity and biogeography of rhizobia associated with soybean plants grown in the North China Plain. *Appl Environ Microbiol* 77:6331-42.
2. Quandt J, Hynes MF. 1993. Versatile suicide vectors which allow direct selection for gene replacement in Gram-negative bacteria. *Gene* 127:15-21.
3. Figurski DH, Helinski DR. 1979. Replication of an origin-containing derivative of plasmid RK2 dependent on a plasmid function provided in trans. *Proc Natl Acad Sci U S A* 76:1648-52.
